# Supplementary material for: SARS-CoV-2 infection studies in lung organoids identify TSPAN8 as novel mediator
Source: PubMed Central journal article supplement — bioRxiv. 2021 Jun 2:2021.06.01.446640. Preprint. [Version 1] doi: 10.1101/2021.06.01.446640 (PMC8183007; doi:10.1101/2021.06.01.446640), 2021-06-02
Supplement: media-2.pdf [file media-2.pdf]

| Sample ID        | Age | Sex | Smoker (Y/N)        | Heart Condition (Y/N) | Other Conditions                                                                                | Location of Sample        | Lung Sample Side | Specific Sample Location |
|------------------|-----|-----|---------------------|-----------------------|-------------------------------------------------------------------------------------------------|---------------------------|------------------|--------------------------|
| 2425LL           | 81  | F   | Y                   | Y                     | NSCLC, CAD, HTN, HLD                                                                            | Lower Lobe                | Right            |                          |
| 2441LL           | 49  | F   | N                   | N                     | NSCLC                                                                                           | Lower Lobe                | Right            |                          |
| 2450UL           | 74  | F   | Y                   | Y                     | NSCLC, HTN, HLD, Non-Sustained and Paroxysmal Ventricular Tachycardia (on beta-blocker therapy) | Upper Lobe                | Left             |                          |
| 2477UL           | 70  | F   | Y                   | N                     | NSCLC                                                                                           | Upper Lobe                | Right            |                          |
| 2478UL           | 64  | F   | Y                   | Y                     | NSCLC, HTN, HLD, Afib (on Xarelto)                                                              | Upper Lobe                | Left             |                          |
| 2520LL           | 46  | F   | N                   | N                     | NSCLC                                                                                           | Lower Lobe                | Left             | Anterior Basilar Segment |
| 2521UL           | 58  | M   | Y                   | Y                     | NSCLC, Afib                                                                                     | Upper Lobe                | Right            |                          |
| 2522UL           | 76  | F   | Y                   | N                     | NSCLC, HTN                                                                                      | Upper Lobe                | Right            |                          |
| 2523LL           | 38  | F   | N                   | N                     | NSCLC, Unconfirmed Tachycardia                                                                  | Lower Lobe                | Right            |                          |
| 2524UL           | 50  | F   | N                   | N                     | NSCLC                                                                                           | Upper Lobe                | Left             |                          |
| 2525UL           | 79  | F   | N                   | N                     | NSCLC                                                                                           | Upper Lobe                | Left             | Apical                   |
| 2526UL           | 66  | F   | Y                   | N                     | NSCLC                                                                                           | Upper Lobe                | Right            |                          |
| 2527UL           | 70  | F   | Y                   | N                     | NSCLC                                                                                           | Upper Lobe                | Left             |                          |
| 2531UL           | 80  | M   | Y (former)          | N                     | NSCLC                                                                                           | Upper Lobe                | Right            |                          |
| 2547UL           | 76  | F   | Y                   | N                     | NSCLC, CAD, HTN                                                                                 | Upper Lobe                | Left             |                          |
| 2551ML           | 26  | F   | Y                   | N                     | NSCLC                                                                                           | Middle Lobe               | Right            |                          |
| L1UL, L1ML, L1LL | 32  | M   | Y (meth, marijuana) | N/A                   | Psychaitric Problems                                                                            | Upper, Middle, Lower Lobe | Left             |                          |
| L2UL, L2LL       | 27  | M   | Y                   | N/A                   | N/A                                                                                             | Upper, Lower Lobe         | Left             |                          |
| L3LL             | 56  | M   | N                   | N/A                   | Bronchial Asthma                                                                                | Lower Lobe                | Left             |                          |
| L5LL             | 65  | F   | Y                   | N/A                   | Post-Op Pnemonia on Emphysema/ Bronchoectasia Background                                        | Lower Lobe                | Right            |                          |
| L6UL             | 56  | F   | N                   | N/A                   | N/A                                                                                             | Upper Lobe                | Left             |                          |
| L7UL, L7LL       | 30  | M   | Y (former)          | N/A                   | Asthma, Diabetes, HTN                                                                           | Upper, Lower Lobe         | Left             |                          |
